# Supplementary material for: Enhanced Transdermal Delivery of Concentrated Capsaicin from Chili Extract-Loaded Lipid Nanoparticles with Reduced Skin Irritation
Source: PubMed Central journal article supplement (PMC7285225; doi:10.3390/pharmaceutics12050463), 2020-05-19
Supplement: pharmaceutics-12-00463-s001.pdf [file pharmaceutics-12-00463-s001.pdf]

Article

# Enhanced Transdermal Delivery of Concentrated Capsaicin from Chili Extract-Loaded Lipid Nanoparticles with Reduced Skin Irritation

Phunsuk Anantaworasakul <sup>1</sup>, Wantida Chaiyana <sup>1,2</sup>, Bozena B. Michniak-Kohn <sup>3</sup>, Wandee Rungseevijitprapa <sup>4,\*</sup> and Chadarat Ampasavate <sup>1,5,\*</sup>

## Capsaicin contents in chili extract

The high-performance liquid chromatography (HPLC) chromatograms of capsaicin and dihydrocapsaicin show the retention times of 7.315 and 9.932 min, respectively.

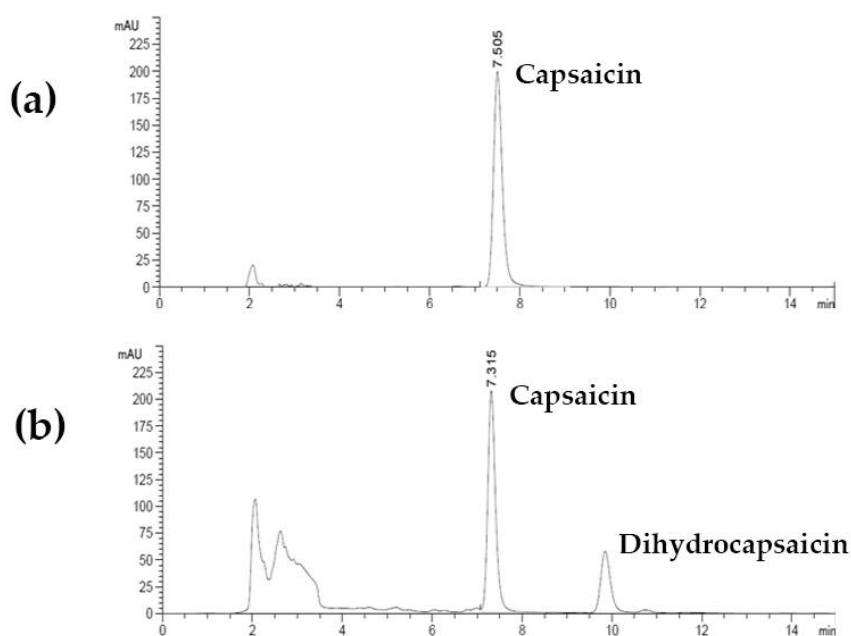

**Figure S1.** Representative high-performance liquid chromatography (HPLC) chromatograms of capsaicin (a) and chili extract (b).

**Table S1.** The solidified inner crystal patterns of each solid lipid.

| <b>Solid Lipid</b>    | <b>m.p. (°C)</b> | <b>rHLB</b> | <b>5X</b>                                                                          | <b>10X</b>                                                                          | <b>20X</b>                                                                           |
|-----------------------|------------------|-------------|------------------------------------------------------------------------------------|-------------------------------------------------------------------------------------|--------------------------------------------------------------------------------------|
| Glyceryl behenate     | 69.74            | 2           | 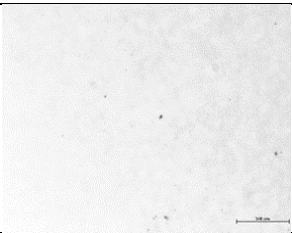  |   |   |
| Glyceryl monostearate | 55               | 3.8         |   |   |   |
| Stearyl alcohol       | 59.8             | 15.5        |   |   |   |
| Cetyl alcohol         | 49.3             | 15.5        |  |  |  |

**Table S2.** Regression coefficient ( $R^2$ ) values of the kinetic models.

| <b>Formulation</b> | <b>Zero-order</b> | <b>First-order</b> | <b>Higuchi</b> |
|--------------------|-------------------|--------------------|----------------|
| Capsaicin          | 0.9952            | 0.9201             | 0.9754         |
| Chili extract      | 0.9918            | 0.8893             | 0.9786         |
| SLN chili          | 0.9952            | 0.8459             | 0.9818         |
| NLC chili          | 0.9941            | 0.8346             | 0.9841         |
